# Supplementary material for: Engineered natural killer cells impede the immunometabolic CD73-adenosine axis in solid tumors
Source: eLife journal article supplement (doi:10.7554/elife.73699), 2022-07-11
Supplement: supp [file elife_poa_e73699_Figure_1_figure_supplement_1.docx]

**A**


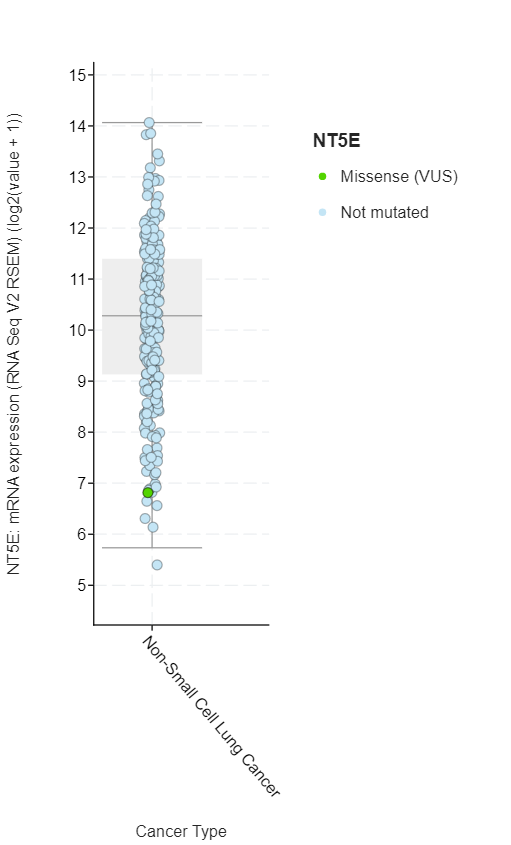

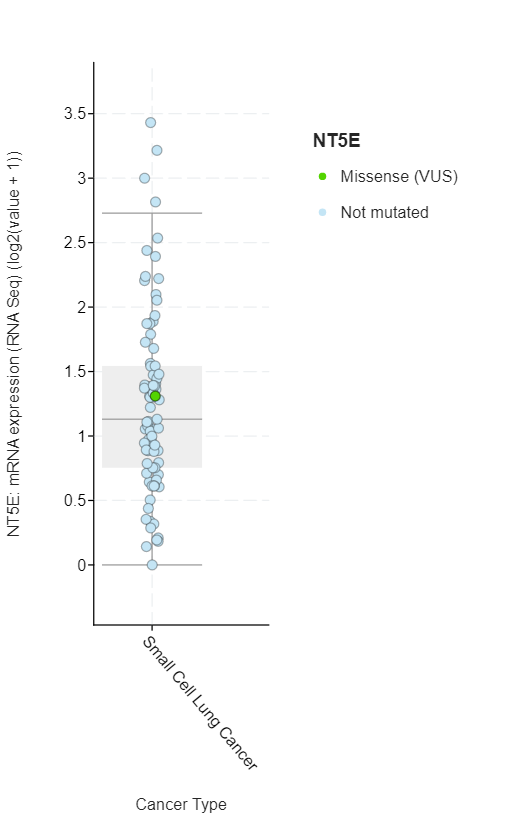


**B**


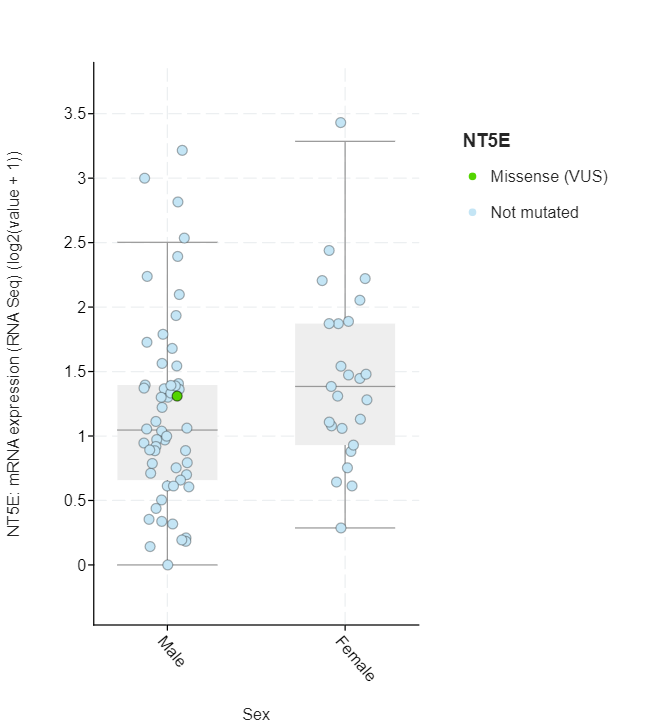

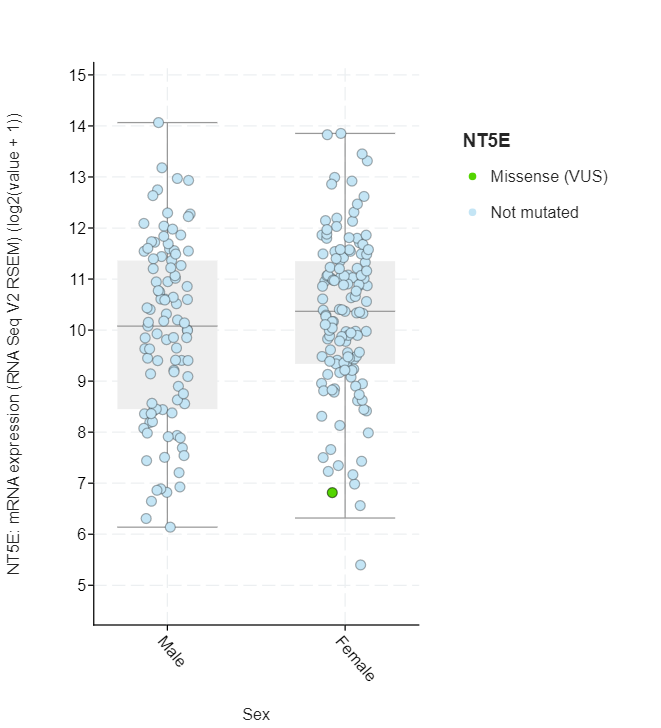


**Figure S2 (Figure 1 – Figure Supplement 1)**. **Bioinformatic analysis of expression of CD73 (*NT5E*) in NSCLC and SCLC.** (A) *NT5E* expression in (*left*) NSCLC1 and (*right*) SCLC2 TCGA databases. (B) *NT5E* expression in (*left*) NSCLC1 and (*right*) SCLC2 TCGA databases stratified by sex.

1TCGA, Firehose Legacy – 230 patients with RNA-seq data

2U Cologne, Nature 2015) – 81 patients with RNA-seq data
