# Supplementary material for: Engineered natural killer cells impede the immunometabolic CD73-adenosine axis in solid tumors
Source: eLife journal article supplement (doi:10.7554/elife.73699), 2022-07-11
Supplement: supp [file elife_poa_e73699_Figure_1_figure_supplement_2.docx]

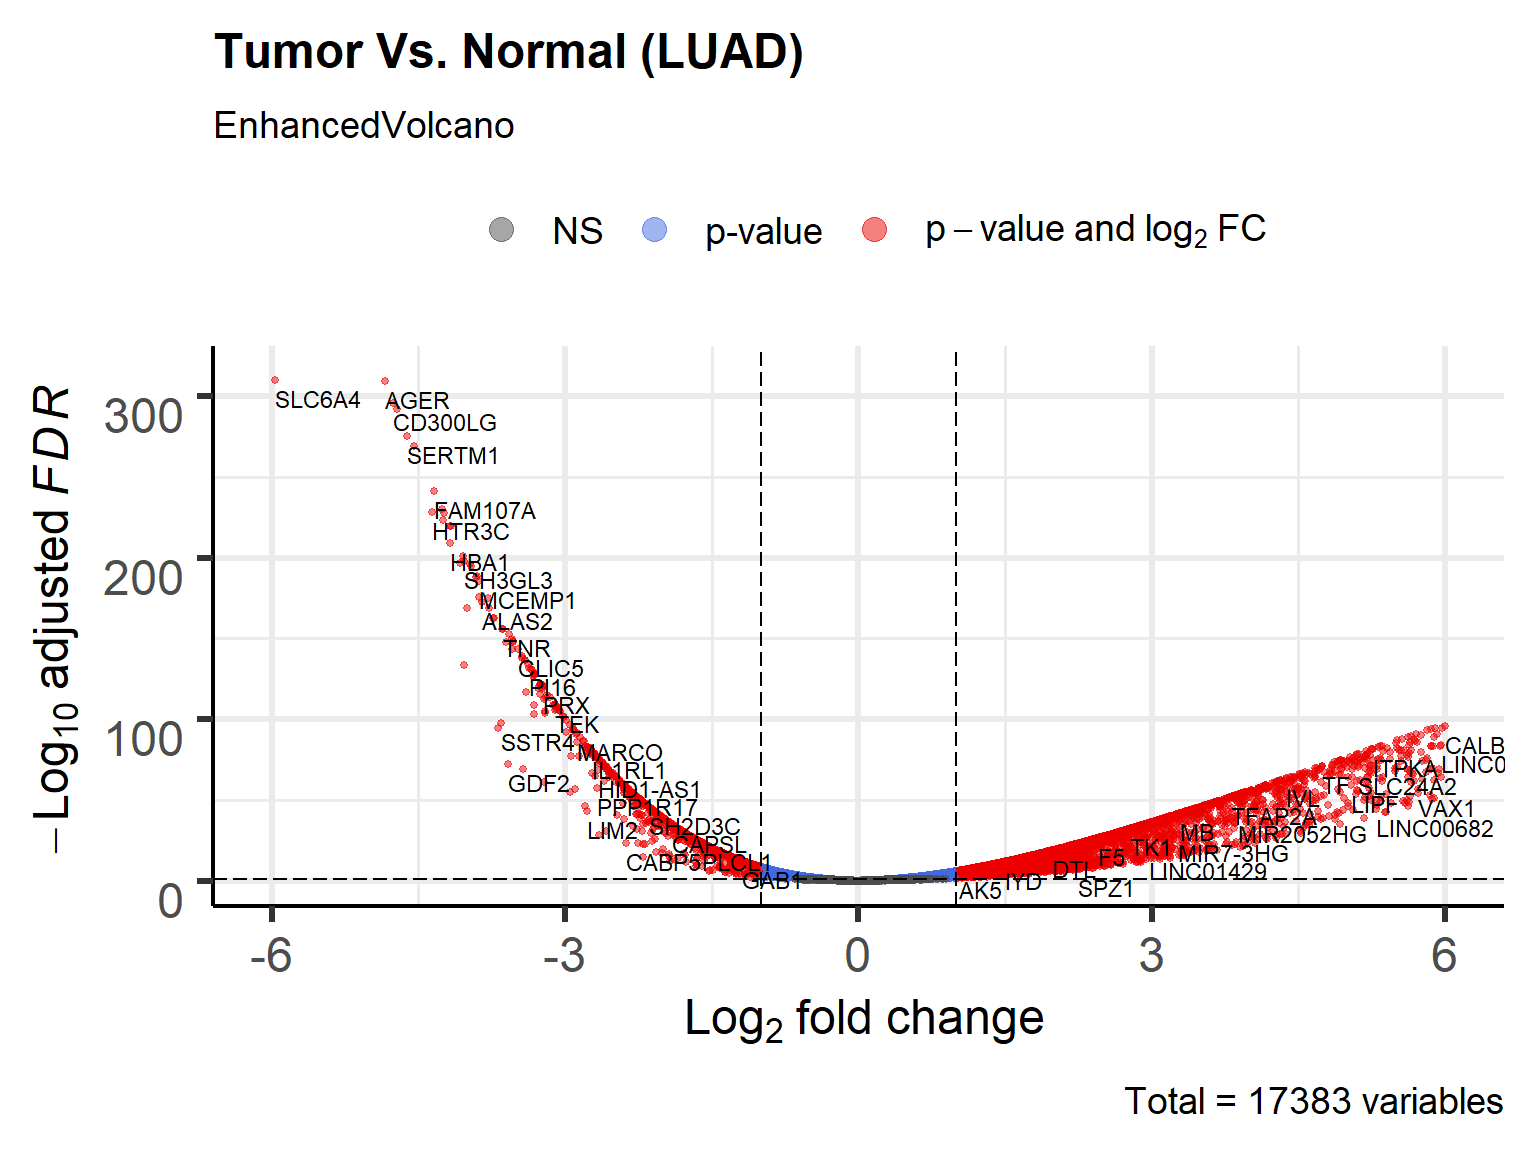


**Figure S3 (Figure 1 – Figure Supplement 2)**. Volcano plot of differential expression genes (tumor vs. normal) in lung adenocarcinoma based on bioinformatics analysis of TCGA patient data. Non-significant (NS) genes are shown in gray. Significant genes (FDR < 0.05 and log2FC cutoff 2) are shown in red. Genes passing only FDR cutoff are shown in blue and genes passing only the log2FC cutoff (if any) are shown in green.
