# Supplementary material for: Engineered natural killer cells impede the immunometabolic CD73-adenosine axis in solid tumors
Source: eLife journal article supplement (doi:10.7554/elife.73699), 2022-07-11
Supplement: supp [file elife_poa_e73699_Figure_1_figure_supplement_4.docx]

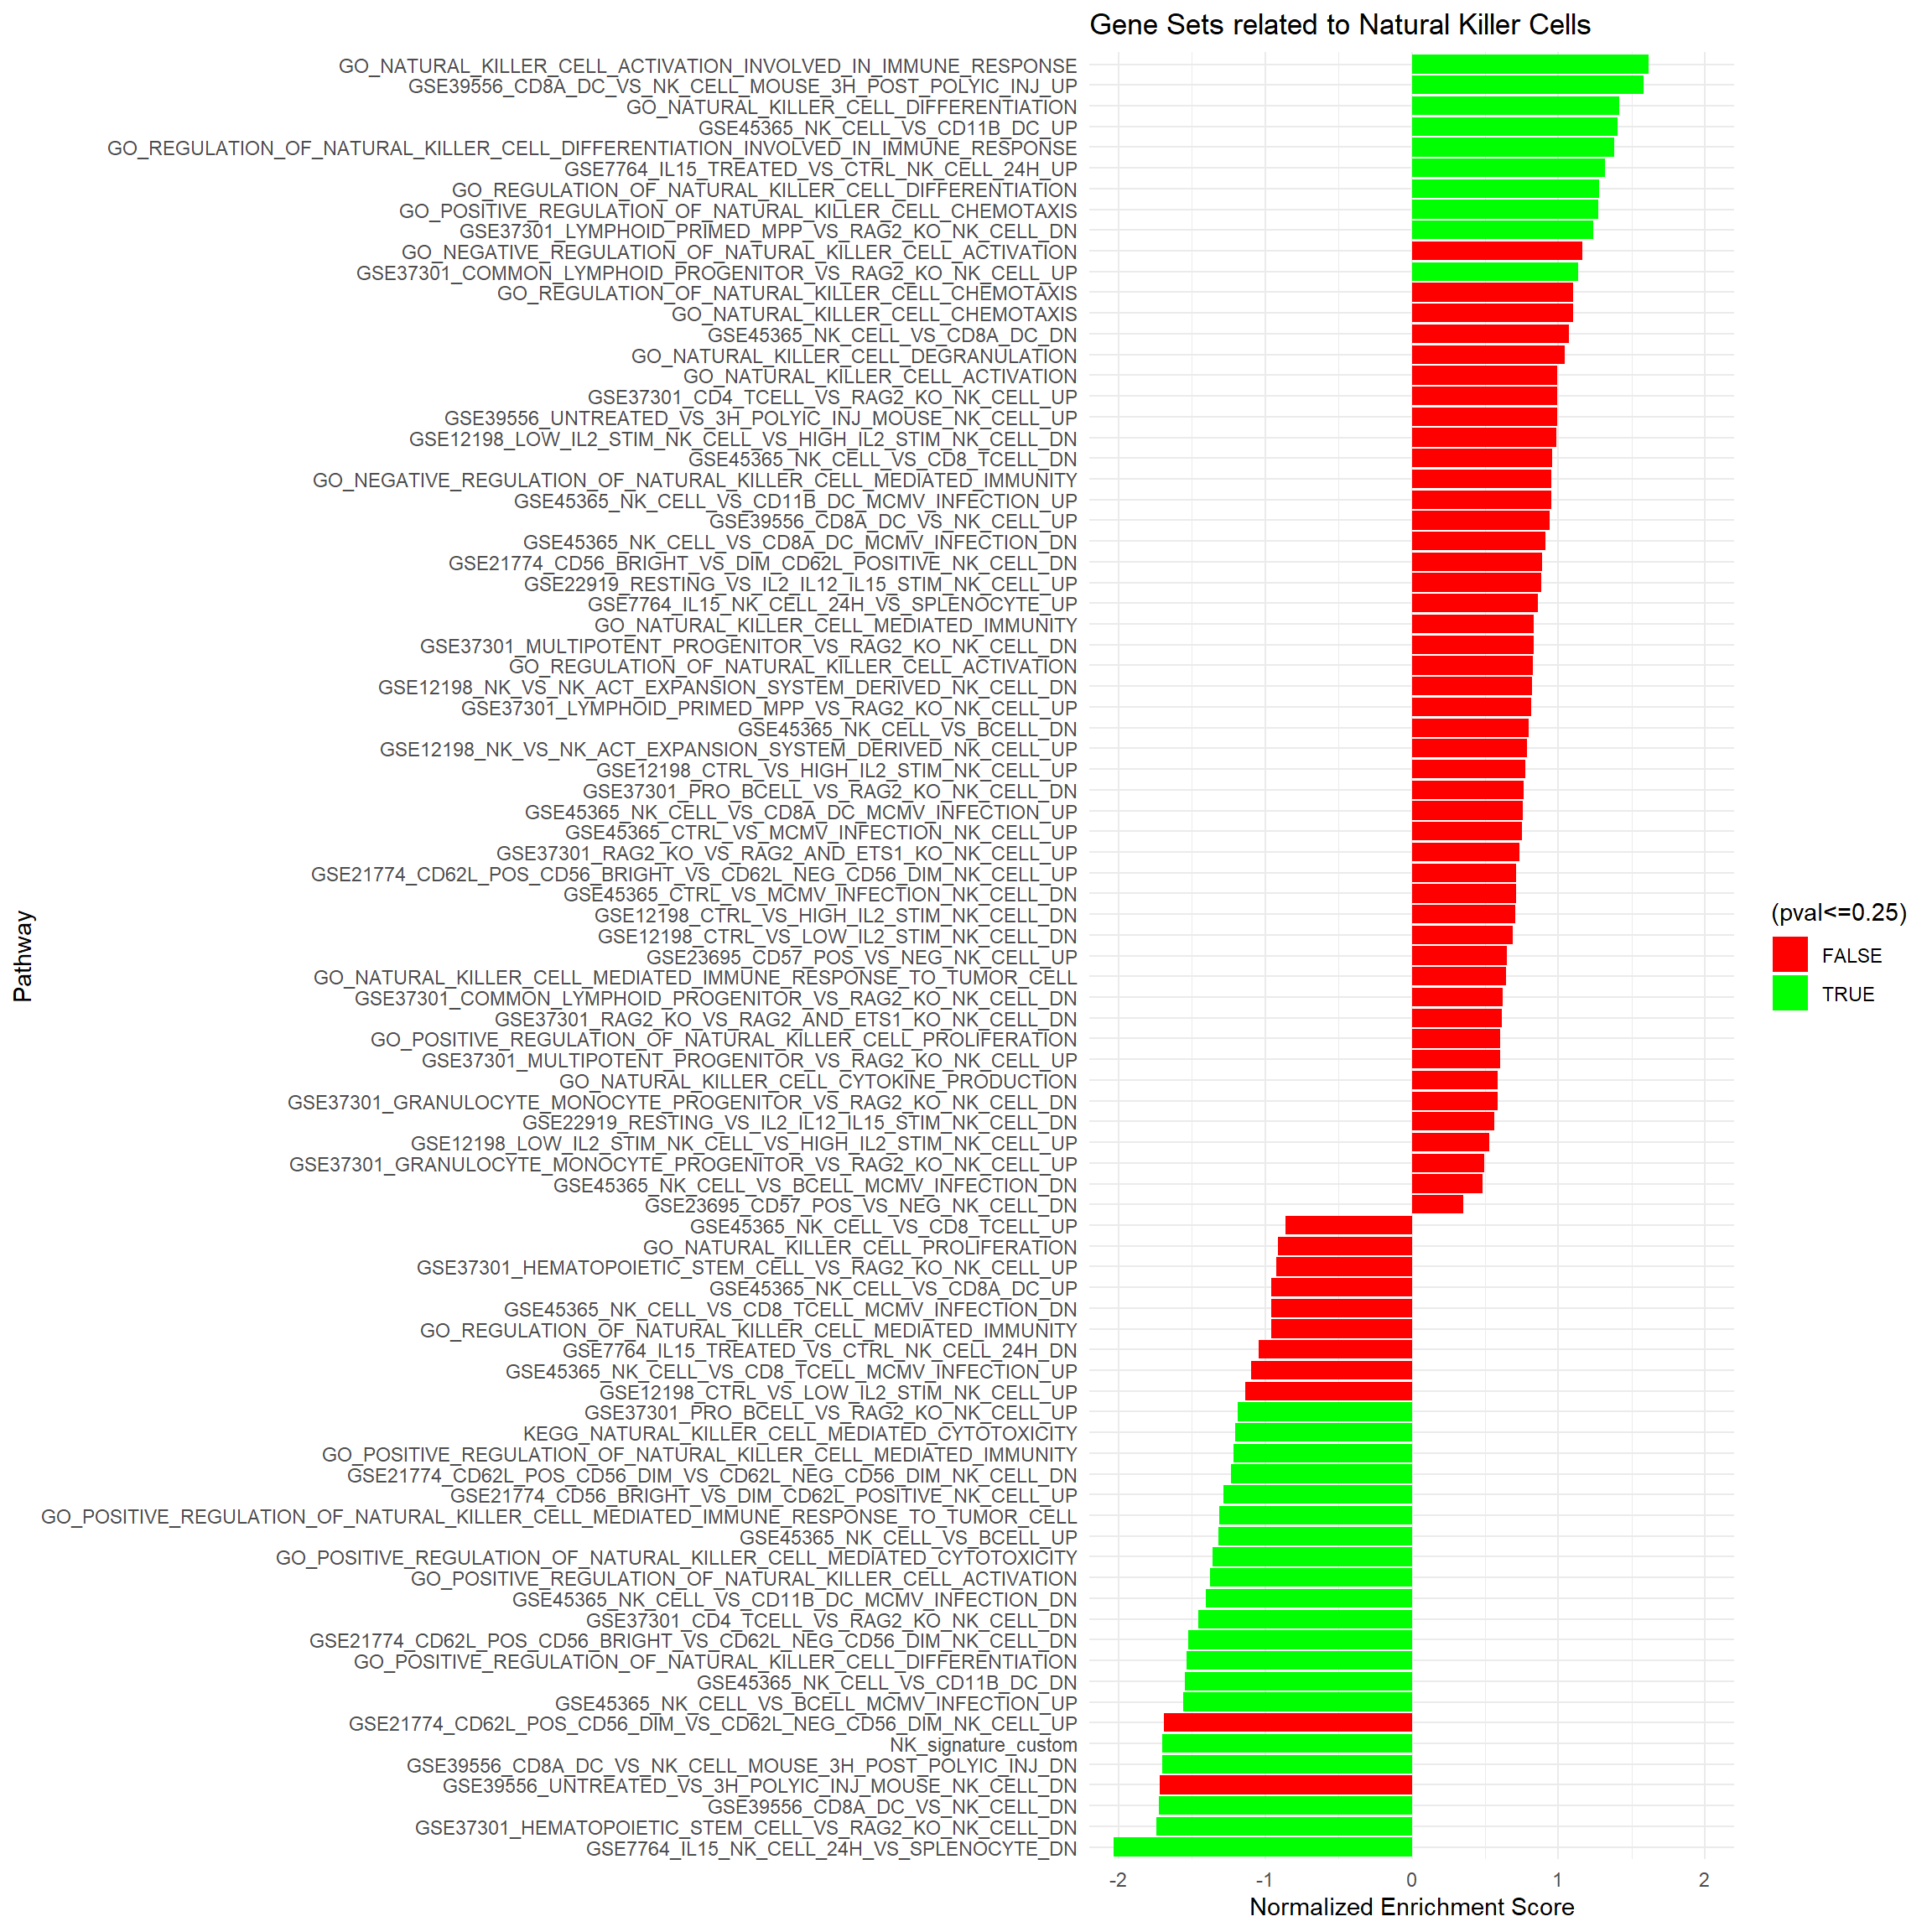


**Figure S5 (Figure 1 – Figure Supplement 4).** Gene set enrichment analysis of lung adenocarcinoma TCGA data related to natural killer cells. KEGG, GO Biological Processes and Immunological Signature databases were used. Significant and non-significant pathways shown.
