# Supplementary material for: Engineered natural killer cells impede the immunometabolic CD73-adenosine axis in solid tumors
Source: eLife journal article supplement (doi:10.7554/elife.73699), 2022-07-11

**Figure S1 (Figure 2 – Figure Supplement 1).** Gating strategy for human NK cell identification by flow cytometry. Identification of CD56+CD3− human NK cells from peripheral blood.


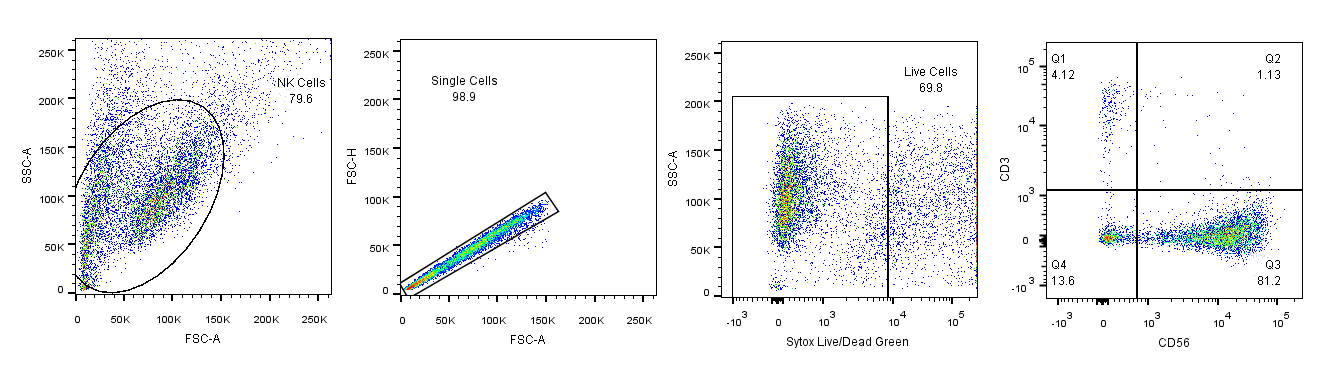

Supplement: supp [file elife_poa_e73699_Figure_2_figure_supplement_1.docx]
