# Supplementary material for: Engineered natural killer cells impede the immunometabolic CD73-adenosine axis in solid tumors
Source: eLife journal article supplement (doi:10.7554/elife.73699), 2022-07-11
Supplement: supp [file elife_poa_e73699_Figure_2_figure_supplement_2.docx]

**Figure S6 (Figure 2 – Figure Supplement 2).** Optimization of mRNA electroporation of human NK cells. Electroporation conditions tested for expression of the CD73.CAR construct on primary NK cells. ++ indicates highest and most optimal condition for CAR expression.
