# Supplementary material for: Engineered natural killer cells impede the immunometabolic CD73-adenosine axis in solid tumors
Source: eLife journal article supplement (doi:10.7554/elife.73699), 2022-07-11
Supplement: supp [file elife_poa_e73699_Figure_2_figure_supplement_3.docx]

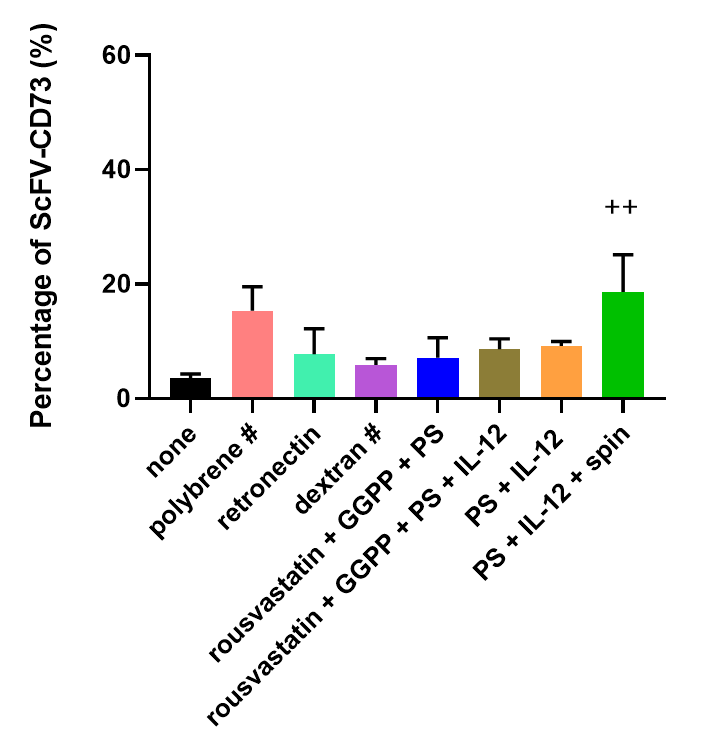


**Figure S7 (Figure 2 – Figure Supplement 3)**. Optimization of lentiviral transduction of human NK cells to express the CD73.CAR construct. Transduction condition tested. ++ indicates most optimal, # indicates all the cells did not survive transduction conditions and eventually died. PS = protamine sulfate, GGPP = Geranylgeranyl pyrophosphate
