# Supplementary material for: Engineered natural killer cells impede the immunometabolic CD73-adenosine axis in solid tumors
Source: eLife journal article supplement (doi:10.7554/elife.73699), 2022-07-11
Supplement: supp [file elife_poa_e73699_Figure_3_figure_supplement_1.docx]

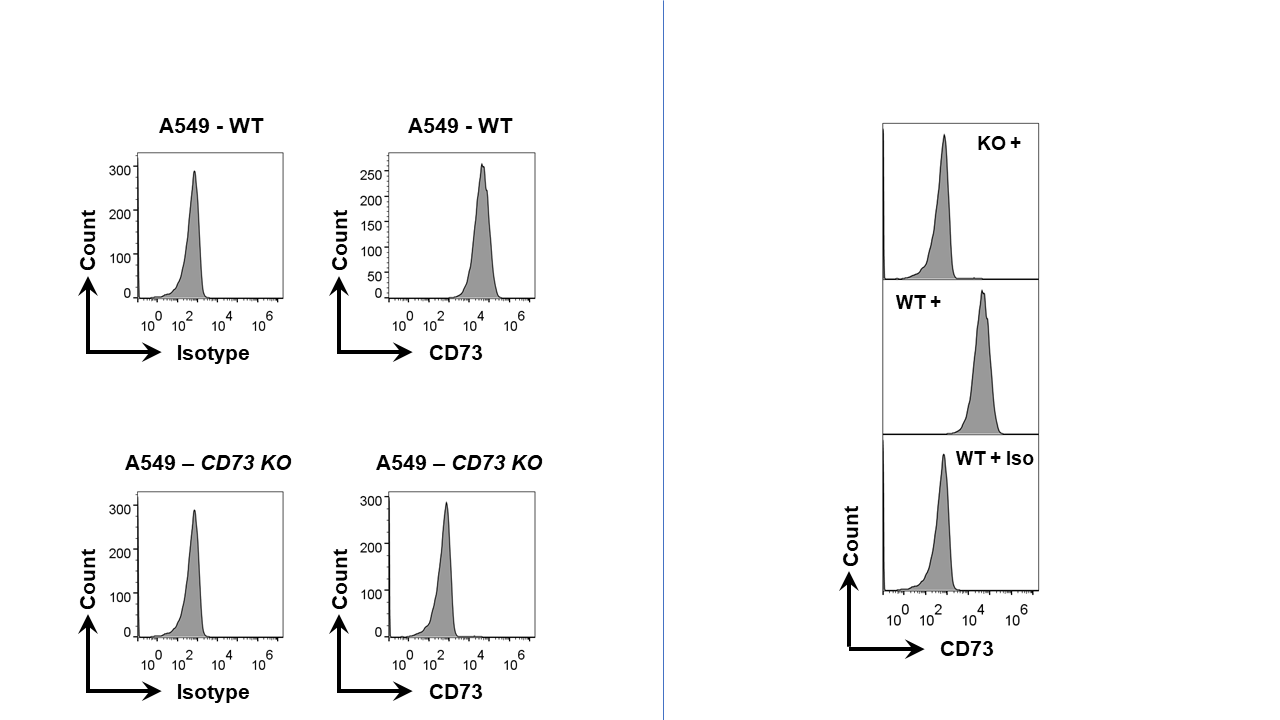


**Figure S8 (Figure 3 – Figure Supplement 1).** Histograms for expression of CD73 on (*top*) WT and (*bottom row*) CD73KO A549 cells. CD739KO A549 cells were generated via CRISPR/Cas9 gene editing as described in the *Methods* section.
